# Supplementary material
Source: publisher figshare collection journal article supplement (https://plos.figshare.com/articles/dataset/_/150466)
Supplement: Supplementary file 1 [file 1]

tataaatccaggtttaagggaagcggaatctcag[**ATG**AGCAGCCCGACCCAAAGTCGGCTAGGGG  
 CCGAGGGGGTGGGGCCACAGGCGGGCCGCGGCCGACGTCGCC[**G/A**]GCTCGCGCGGGCTAGCGG  
 GCGAGGCTCCACTCCCTCCTGGTTACACCTTTGGGCTTTCTTACCAGAGTGGCGCCTGCTGTTTCC  
 TGGGTCCGAGATTCTTGGCCACAGCGGTGACGCTGTGGCTACTTGGACTTCTGTGCATCCGCAAGA  
 AGGTGGCTG[**ATG**AGACACCCGGCGCAAGCGACGCTGTATACCTTGGAAAGCGGGTGGGGCGGGG  
 GCGGGGTGGAAAGAGAGAGGAGGAGTACGCGCAGCTGTTAGCTTTGTACCGGGGGTACCCCCGAGT  
 ACCCGCAATCTTGGGTCTCTGACTCCAATCGGTTCTGCATATAGAGTGCCTGAAGGCTGTCTGC  
 ACGGGCAAAAGATGGACTTCTTCAAACCTGCCCAAGGGCTCCCCAGCCCCCAATCCCGAGGTCAT  
 TTCAGCTGGATGGACTTAAAGACTCGGCATCTTAGACTTTTGC CGGGGCGAGCGGGCGCTGTGTC  
 TCAACTTCGCGACGCTGCACCTGACCCCCGTTTACAGGCGGGCTGCGCGGCTTCCAGCATCTCGGCT  
 CCACCTTCTTAGACATCGCGCACTTCTTGTCTGTATACATCGAAGAAGCCCCACCTTCCGACGGCT  
 GGGTCACCTCAGATCGAGCCTACGACATCCCCAACCAAGTCGCTTTCAGGACCGGCTGCGCGCGC  
 CCGGGCTTCTCGAGGAGGCGCACCGGGATGCTTGTCTCGGGTGGACAGCATGGACAACCGCTCCA  
 CTGAGCTCTACGGTGCTTACTCTGAGCGGCTCTATATCATCCAGAGGCGCGAGTCACTGATACCGG  
 GGGGACGAGGCCCCGAGGGCTACAAGATCTCAGAACTGAGACACTGGCTCGACAGCAGTACAAGACC  
 GCCTGCAGAGCCACC GGCTCCGTTGCTACCTGTGTAA[**ttgaccggtttcccaaaacaagaacc**  
 ccaaaaaaacgtgcaattgaagggttttcaatcacagaaagtgcacgttacacaaaaagaagggggaa  
 gggagaatttagcccatggggggaggggtttccagtgggggaaacacttctcttctccctctcccca  
 aattctctttttctctc[**ctt**]gggttttttctctccactttgttgactcgagtcgaacatttgtat  
 atgtgtgcgctgtgcatcgtgtgtgttaaactctgttaactctgtgagtgcctgtgttttcccgcaaga  
 gaagaagcacccccccgactctgggacaactcaagctctacaggggcaactcctgtgtcgtgagaa  
 gaaggaaggaaggaaggaaggaaggaaggaaggaaggaaggaaggaaggaaggaaggaaggaagga  
 aggaaggaaggaaggaaggaaggaaggaaggaaggaaggaaggaaggaaggaaggaaggaaggaag  
 ggaagggggggagagagagagagagagagagagaatttagagtccataaataagtgtgaagaatttgtat  
 ctgccaaagtatcccgatgtgtgactgttaactctgtcctactggtctcgctggcctgtgtgtgtgcgc  
 gcaacgctgtgatccgatgtctctcggtgtgtgaactttttaaaggggagctctgggctgaccctgct  
 cctcccagcccacttctctctcttgtttctaccaattccgtatgtcccagattcttctctgtctcgt  
 aatctcccaaggtgtgtgatattgtttgttaaaggtgtatgtcggggtgggggagggggaggaagta  
 tccggaaggaagggggacttgcggggggaggaaggttgtgtgtgcgcgaggaagtgtgtctagtagt  
 gctttttctcatcccggttctggcaacttctttgggtccctctggtagtgcagacctgttctgaatttg  
 gtcccagaccaggaaaccggtgtctgatattcttagtgacctagaagtgccctaacccgcgagagaaa  
 aatgagtgtttaatgtatttataaaagtgtttgggaaagctaggtttgggggtgggggtgggggggc  
 tctcggtgtgggttttgacgatctttgaatctagaactggggcgggagagagggaggttctcagttgg  
 agggctctttggggcggtttgggtgatcttgagcctatctggcttggaagaacctagctttggggaata  
 taacgattttggaattcttagtgttaggttagttatcccctatttgaaggaataacctagttctgtatg  
 tactgtggaagaataatcatgaattcatcggtcccttgctcaggggtgaaacgagagcaggaatcta  
 gacctttgtataga[**ataaa**

[illegible]
